# Supplementary material for: Comparison of dementia risk between end stage renal disease patients with hemodialysis and peritoneal dialysis - a population based study
Source: PubMed Central journal article supplement (PMC4340159; doi:10.1038/srep08224), 2015-02-23
Supplement: srep08224-s1.pdf [file srep08224-s1.pdf]

**Manuscript Title:** Comparison of dementia risk between end stage renal disease patients with hemodialysis and peritoneal dialysis - a population based study

**Authors, Institution and Affiliations:**

Yi-Ting Lin<sup>1,4</sup>, Ping-Hsun Wu<sup>2,5</sup>, Mei-Chuan Kuo<sup>2,6</sup>, Cheng-Sheng Chen<sup>3,7</sup>, Yi-Wen Chiu<sup>2,6</sup>, Yi-Hsin Yang<sup>8</sup>, Ming-Yen Lin<sup>2,9</sup>, Shang-Jyh Hwang<sup>2,6</sup>, Hung-Chun Chen<sup>2,6</sup>

<sup>1</sup>Department of Family Medicine, <sup>2</sup>Division of Nephrology, Department of Internal Medicine, <sup>3</sup>Department of Psychiatry, Kaohsiung Medical University Hospital, Kaohsiung, Taiwan;

<sup>4</sup>Department of Public Health , College of Life Science <sup>5</sup>Graduate Institute of Medicine, <sup>6</sup>Faculty of Renal Care, <sup>7</sup>Department of Psychiatry, College of Medicine, <sup>8</sup>School of Pharmacy, College of Pharmacy, Kaohsiung Medical University, Kaohsiung, Taiwan

<sup>9</sup>Technology Research Center, National Applied Research Laboratories, Taiwan

**Corresponding author:**

Yi-Wen Chiu, M.D

Division of Nephrology, Department of Internal Medicine, Kaohsiung Medical University Hospital

No.100, Tzyou 1st Road Kaohsiung 807, Taiwan

Telephone number: 886-7-3121101 ext 7351

Fax number: 886-7-3228721

E-mail address: [chiuyiwen@kmu.edu.tw](mailto:chiuyiwen@kmu.edu.tw)

Supplementary Table S1. ICD-9-CM codes used to identify clinical conditions

| Diagnosis                             | Corresponding ICD-9-CM codes                                                                                                                        |
|---------------------------------------|-----------------------------------------------------------------------------------------------------------------------------------------------------|
| Hemodialysis                          | <b>【585】</b> plus procedure code 58001C, 58019C, 58020C, 58021C, 58022C, 58023C, 58024C, 58025C, 58026C, 58027C, 58029C last for more than 3 months |
| Peritoneal dialysis                   | <b>【585】</b> plus PD solution using for more than 3 months                                                                                          |
| Dementia                              | <b>【290】 【291.2】 【294.1】 【331.0】 【331.1】 【331.2】</b>                                                                                                |
| Diabetes mellitus                     | <b>【250】</b>                                                                                                                                        |
| Hypertension                          | <b>【401】 ~ 【405】</b>                                                                                                                                |
| Hyperlipidemia                        | <b>【272】</b>                                                                                                                                        |
| Coronary artery disease               | <b>【410】 ~ 【414】</b>                                                                                                                                |
| Heart failure                         | <b>【398.91】 【402.01】 【402.11】 【402.91】 【404.01】</b><br><b>【404.03】 【404.11】 【404.13】 【404.91】 【404.93】</b><br><b>【428】</b>                          |
| Atrial fibrillation                   | <b>【427.3】</b>                                                                                                                                      |
| Peripheral artery disease             | <b>【440.2】 ~ 【440.4】 【443.9】</b>                                                                                                                    |
| Cerebrovascular disease               | <b>【430】 ~ 【438】</b>                                                                                                                                |
| Chronic obstructive pulmonary disease | <b>【491】 【492】 【496】</b>                                                                                                                            |
| Asthma                                | <b>【493】</b>                                                                                                                                        |
| Thyroid disease                       | <b>【242】 【244】 【245】</b>                                                                                                                            |
| Systemic lupus erythematosus          | <b>【710】</b>                                                                                                                                        |

|                       |                                                                                                      |
|-----------------------|------------------------------------------------------------------------------------------------------|
| Rheumatoid arthritis  | <b>【714】</b>                                                                                         |
| Osteoarthritis        | <b>【715】</b>                                                                                         |
| Gout                  | <b>【274】</b>                                                                                         |
| Chronic liver disease | <b>【571】 【572.2】 ~ 【572.8】 【573.1】 ~ 【573.3】 【456.0】</b><br><b>~ 【456.2】</b>                         |
| Peptic ulcer disease  | <b>【531】 ~ 【534】</b>                                                                                 |
| Malignancy            | <b>【140】 ~ 【208】</b>                                                                                 |
| Alcoholism            | <b>【291】 【303】 【305.0】 【357.5】 【425.5】 【571.0】</b><br><b>【571.1】 【571.2】 【571.3】 【980.0】 【V11.3】</b> |
| Psychotic disorder    | <b>【290.8】 【290.9】 【295】 【297】 ~ 【299】 【780.1】</b>                                                   |
| Depressive disorder   | <b>【296.2】 【296.3】 【296.82】 【300.4】 【309.0】</b><br><b>【309.1】 【311】</b>                              |
| Anxiety disorder      | <b>【300.0】 ~ 【300.3】</b>                                                                             |
| Sleep disorder        | <b>【307.4】 【780.5】</b>                                                                               |
| Seizure disorder      | <b>【345】 【780.3】</b>                                                                                 |

---

Footnotes: ICD, international classification of disease

Supplementary Table S2. Drugs (Anatomical Therapeutic Chemical code) concomitant prescriptions in the present study

| Drug type                                        | ATC classification system codes    | Drug name                                                                                                                                                                                                |
|--------------------------------------------------|------------------------------------|----------------------------------------------------------------------------------------------------------------------------------------------------------------------------------------------------------|
| Antiplatelets                                    | B01AC04, B01AC05, B01AC06          | Clopidogrel, Ticlopidine, Acetylsalicylic acid (Aspirin)                                                                                                                                                 |
| Anticoagulants                                   | B01AA03                            | Warfarin                                                                                                                                                                                                 |
| Dipyridamole                                     | B01AC07                            | Dipyridamole                                                                                                                                                                                             |
| Nitrates                                         | C01DA02, C01DA04, C01DA14, C01DA52 | Glyceryl trinitrate, Isosorbide dinitrate, Isosorbide mononitrate                                                                                                                                        |
| Angiotensin-converting enzyme inhibitors (ACEIs) | C09A, C09B                         | Captopril, Enalapril, Lisinopril, Perindopril, Ramipril, Quinapril, Benazepril, Cilazapril, Fosinopril, Imidapril                                                                                        |
| Angiotensin receptor blockers (ARBs)             | C09C, C09D                         | Candesartan, Irbesartan, Losartan, Olmesartan, Telmisartan, Valsartan                                                                                                                                    |
| Beta-blockers                                    | C07A                               | Labetalol, Pindolol, Acebutolol, Alprenolol, Atenolol, Betaxolol, Bisoprolol, Carteolol, Carvedilol, Nadolol, Metoprolol, Oxprenolol, Propranolol, Sotalol, Timolol, Metipranolol, Esmolol               |
| Thiazides                                        | C03AA03, C03AA06                   | Hydrochlorothiazide, Trichlormethiazide                                                                                                                                                                  |
| Calcium channel blockers (CCBs)                  | C08C, C08D, C08E                   | Nifedipine, Nicardipine, Felodipine, Amlodipine, Isradipine, Diltiazem, Verapamil                                                                                                                        |
| Statins                                          | C10AA                              | Atorvastatin, Fluvastatin, Lovastatin, Pravastatin, Rosuvastatin, Simvastatin                                                                                                                            |
| Fibrates                                         | C10AB                              | Bezafibrate, Clofibrate, Etofibrate, Gemfibrozil, Fenofibrate, Simfibrate                                                                                                                                |
| Oral antidiabetic agents                         | A10B                               | Acarbose, Acetohexamide, Buformin, Chlorpropamide, Gliclazide, Glimepiride, Glipizide, Gliquidone, Glyburide, Metformin, Nateglinide, Pioglitazone, Repaglinide, Rosiglitazone, Tolazamide, Tolbutamide, |

|                                                                       |                                          |                                                                                                                                                                                                                                                                                                                                                                                           |
|-----------------------------------------------------------------------|------------------------------------------|-------------------------------------------------------------------------------------------------------------------------------------------------------------------------------------------------------------------------------------------------------------------------------------------------------------------------------------------------------------------------------------------|
| Insulin                                                               | A10A                                     | Sitagliptin, Miglitol<br>Insulin human, Insulin zinc crystal, Insulin chromatograp, Insulin monocomponem, Insulin isophane, Insulin protamine, Insulin lispro, Insulin glargine, Insulin aspart, Insulin glulisine, Insulin detemir                                                                                                                                                       |
| Traditional nonsteroidal anti-inflammatory drugs (Traditional NSAIDs) | M01AA, M01AB, M01AC, M01AE, M01AG, M01AX | Acemetacin, Aloclofenac, Alminoprofen, Benzydamine, Diclofenac, Diflunisal, Etodolac, Etofenamate, Fenbufen, Flufenamate, Flufenamic acid, Flurbiprofen, Ibuprofen, Iclofenac, Indomethacin, Ketoprofen, Ketorolac, Meclofenamate, Meclofenamic acid, Naproxen, Piroxicam, Spirin, Sulindac, Niflumic acid, Tenoxicam, Tiaprofenic acid, Tiamamide, Tolmetin, Tolfenamic acid, Mepirizole |
| Cyclooxygenase-2- selective inhibitors (COX-2 inhibitors)             | M01AH                                    | Celecoxib, Meloxicam, Rofecoxib, Etoricoxib, Nimesulide                                                                                                                                                                                                                                                                                                                                   |
| Proton pump inhibitors (PPIs)                                         | A02BC                                    | Omeprazole, Esomeprazole, Pantoprazole, Lansoprazole, Rabeprazole                                                                                                                                                                                                                                                                                                                         |
| H-2 receptor antagonists                                              | A02BA                                    | Cimetidine, Ranitidine, Famotidine                                                                                                                                                                                                                                                                                                                                                        |
| Antipsychotic agents                                                  | N05A                                     | chlorpromazine, clopenthixol, clothiapine, flupenthixol, fluphenazine, haloperidol, levomepromazine, loxapine, methotrimeprazine, perphenazine, pimozide, pipotiazine, prochlorperazine, sulpiride, trifluoperazine, thioridazine, amisulpride, aripiprazole, clozapine, olanzapine, quetiapine, risperidone, ziprasidone, and zotepine                                                   |
| Antidepressants                                                       | N06A                                     | Fluoxetine, Citalopram, Paroxetine, Sertraline, Fluvoxamine, Escitalopram, Imipramine, Clomipramine, Amitriptyline, Doxepin, Dosulepin, Maprotiline, Melitracen, Nortriptyline, Moclobemide, Duloxetine, Milnacipran, Venlafaxine, Trazodone, Mirtazapine, Bupropion                                                                                                                      |

|                           |              |                                                                                                                                                                          |
|---------------------------|--------------|--------------------------------------------------------------------------------------------------------------------------------------------------------------------------|
| Benzodiazepines           | N05B         | Diazepam, Chlordiazepoxide, Medazepam, Oxazepam, Clorazepate, Lorazepam, Bromazepam, Clobazam, Alprazolam, Nordazepam, Fludiazepam                                       |
| Hypnotics                 | N05C         | Secobarbital, Flurazepam, Nitrazepam, Flunitrazepam, Estazolam, Triazolam, Midazolam, Brotizolam, Zopiclone, Zolpidem, Zaleplon, Dexmedetomidine                         |
| Antiepileptics            | N03A         | Phenobarbital, Phenytoin, Clonazepam, Carbamazepine, Oxcarbazepine, Valproic acid, Vigabatrin, Tiagabine, Lamotrigine, Topiramate, Gabapentin, Levetiracetam, Pregabalin |
| Uric acid lowering agents | M04AA, M04AB | Allopurinol, Febuxostat, Probenecid, Sulfinpyrazone, Benzbromarone                                                                                                       |

---
